# Supplementary material
Source: Springer Nature journal article supplement (https://www.springermedizin.de/resource/supplementary/13058_2009_2443_MOESM12_ESM.pdf/9701424)
Supplement: MOESM12 [file 9701424]

**Table 1:** Comparison between CD24-/low/CD44high population and ZsGreen-cODC+ population, and corresponding sphere forming capacity after fractionated radiation, respectively 8x2 Gy and 5x3 Gy, in MCF-7 and T47D cells.

| MCF-7             |                    |         |                         |         |                         |         |                    |         |      |
|-------------------|--------------------|---------|-------------------------|---------|-------------------------|---------|--------------------|---------|------|
| CD24low/CD44Hight |                    |         |                         |         | ZsGreen-cODC+           |         |                    |         |      |
| Dose              | % of CICs (+/-SEM) |         | Sphere forming capacity |         | Sphere forming capacity |         | % of CICs (+/-SEM) |         | Dose |
| 0                 | 3.01 (+/-0.61)     | p value | 9.4 (+/-0.5)            | p value | 12.32 (+/-2.01)         | p value | 2.17 (+/- 0.47)    | p value | 0    |
| 2                 | 6.54 (+/-1.95)     | 0.095   | 13.49 (+/-1.32)         | 0.01    | 15.25 (+/-3.2)          | 0.661   | 3.70 (+/-0.52)     | 0.051   | 3    |
| 2x2               | 8.04 (+/-1.47)     | 0.036   | 10.76 (+/-0.96)         | 0.137   | 17.54 (+/-4.15)         | 0.096   | 3.13 (+/-0.53)     | 0.2517  | 2x3  |
| 4x2               | 8.56 (+/-1.21)     | 0.020   | 11.85 (+/-1.81)         | 0.198   | 17.93 (+/-2.33)         | 0.051   | 6.73 (+/-1.33)     | 0.141   | 3x3  |
| 6x2               | 9.10 (+/-1.04)     | 0.029   | 11.85 (+/-1.48)         | 0.035   | 24.52 (+/-4.50)         | 0.048   | 11.26 (+/-2.06)    | 0.091   | 4x3  |
| 8x2               | 4.78 (+/-0.34)     | 0.229   | 11.85 (+/-1.27)         | 0.002   | 25.37 (+/-5.2)          | 0.039   | 12.64 (+/-1.91)    | 0.044   | 5x3  |

| T47D              |                    |         |                         |         |                         |         |                    |         |      |
|-------------------|--------------------|---------|-------------------------|---------|-------------------------|---------|--------------------|---------|------|
| CD24low/CD44Hight |                    |         |                         |         | ZsGreen-cODC+           |         |                    |         |      |
| Dose              | % of CICs (+/-SEM) |         | Sphere forming capacity |         | Sphere forming capacity |         | % of CICs (+/-SEM) |         | Dose |
| 0                 | 0.35 (+/-0.06)     | p value | 9.46 (+/-2.20)          | p value | 3.35 (+/-2.01)          | p value | 2.47 (+/-0.88)     | p value | 0    |
| 2                 | 0.34 (+/-0.03)     | 0.868   | 6.74 (+/-1.31)          | 0.014   | 3.13 (+/-2.69)          | 0.231   | 4.31 (+/-1.13)     | 0.029   | 3    |
| 2x2               | 0.43 (+/-0.08)     | 0.471   | 13.76 (+/-4.01)         | 0.146   | 6.48 (+/-3.14)          | 0.091   | 9.72 (+/-2.81)     | 0.068   | 2x3  |
| 4x2               | 2.04 (+/-0.12)     | 0.001   | 12.74 (+/-4.58)         | 0.157   | 9.96 (+/-2.33)          | 0.049   | 16.09 (+/-5.57)    | 0.103   | 3x3  |
| 6x2               | 0.68 (+/-0.04)     | 0.007   | 17.99 (+/-5.17)         | 0.027   | 12 (+/-2.66)            | 0.033   | 24.06 (+/-4.15)    | 0.025   | 4x3  |
| 8x2               | 0.29 (+/-0.01)     | 0.449   | 18.92 (+/-5.83)         | 0.018   | 7.65 (+/-2.55)          | 0.055   | 21.133 (+/-1.87)   | 0.015   | 5x3  |
